# Supplementary material for: The Mildew Resistance Locus O 4 Interacts with CaM/CML and Is Involved in Root Gravity Response
Source: MDPI journal article supplement (doi:10.3390/ijms22115962), 2021-05-31
Supplement: s1 [file s1]

## **Supplemental materials**

**Figure S1-S8**

**Table S1-S3**

## Supplemental figure 1

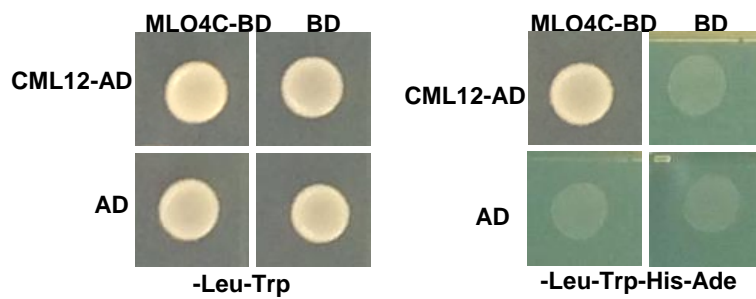

**Figure S1. Y2H showed that CML12 interacted with cytoplasmic domain of MLO4 (MLO4-C).**

## Supplemental figure 2

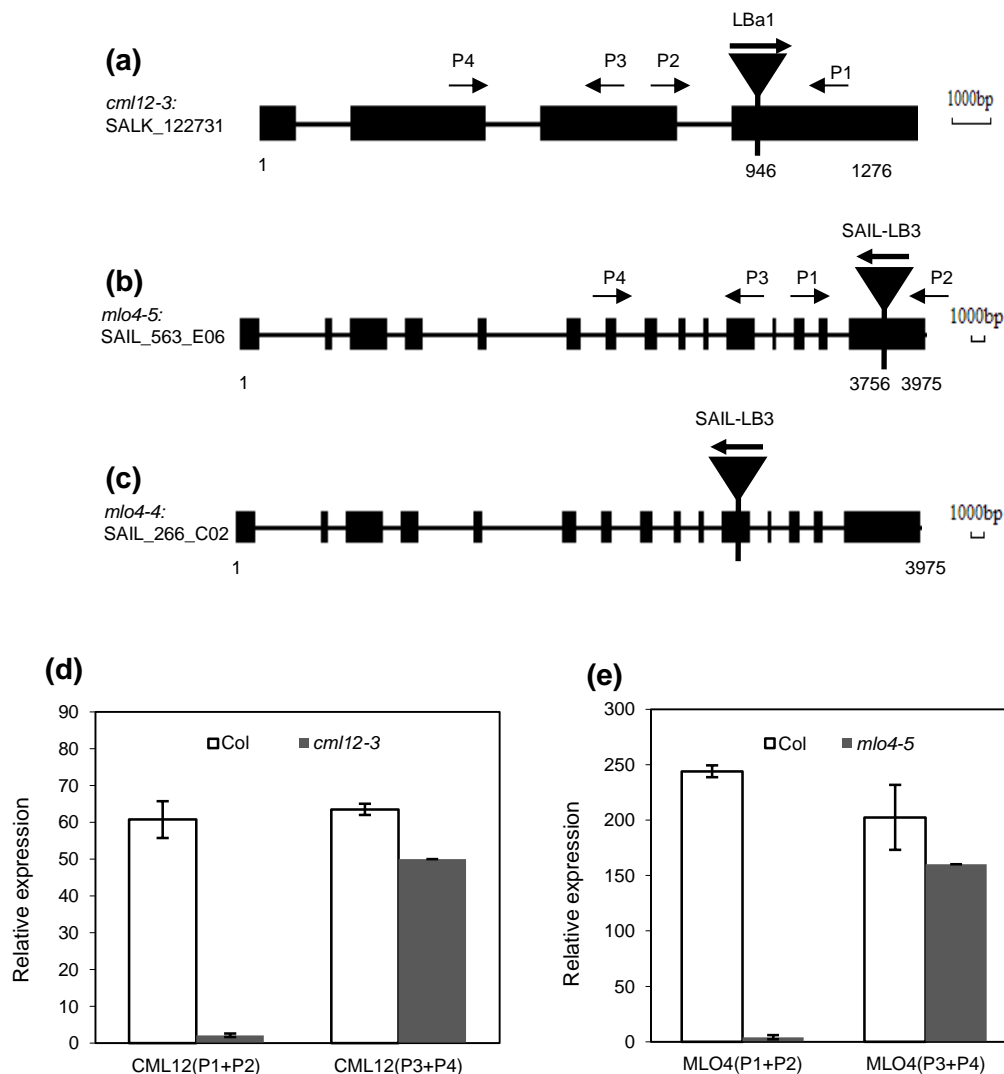

**Figure S2. Identification of *cml12* and *mlo4* mutant.** (a) T-DNA was inserted at the forth exon in *CML12* gene. Black box: exon; black line: intron; Arrow: primers used in the following real-time PCR. (b) T-DNA was inserted at the last exon in *MLO4* gene in *mlo4-5* mutant. (c) T-DNA was inserted at eleventh exon in *MLO4* gene in *mlo4-4* mutant. Black box: exon; black line: intron; Arrow: primers used in the following real-time PCR. (d) Real-time PCR showed that *cml12-3* was a knock-out mutant and expressed truncated protein. (E) Real-time PCR showed that *mlo4-5* was a knock-out mutant and expressed truncated protein.

### Supplemental figure 3

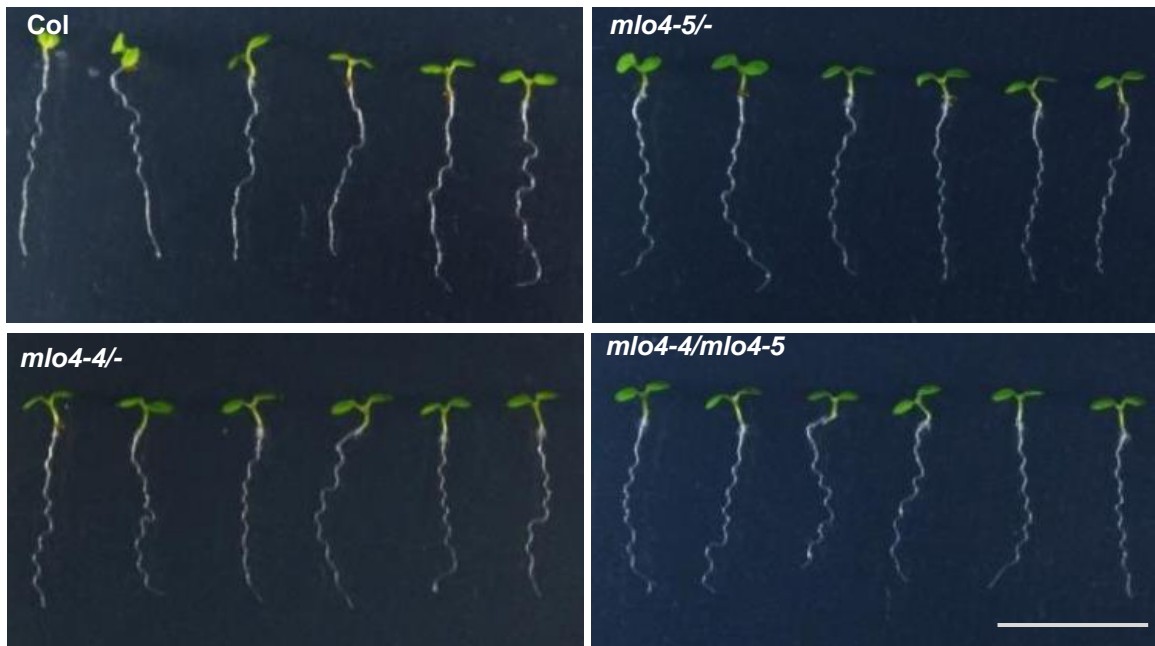

**Figure S3. *mlo4-5* was another allelic mutant of *MLO4* gene.**

Compared to wild-type roots, single mutant *mlo4-5* formed denser loops in roots, similar to *mlo4-4* roots. And F1 progeny of *mlo4-5* and *mlo4-4* showed resembled phenotype like both single *mlo4* mutants. Bar = 1 cm.

## Supplemental figure 4

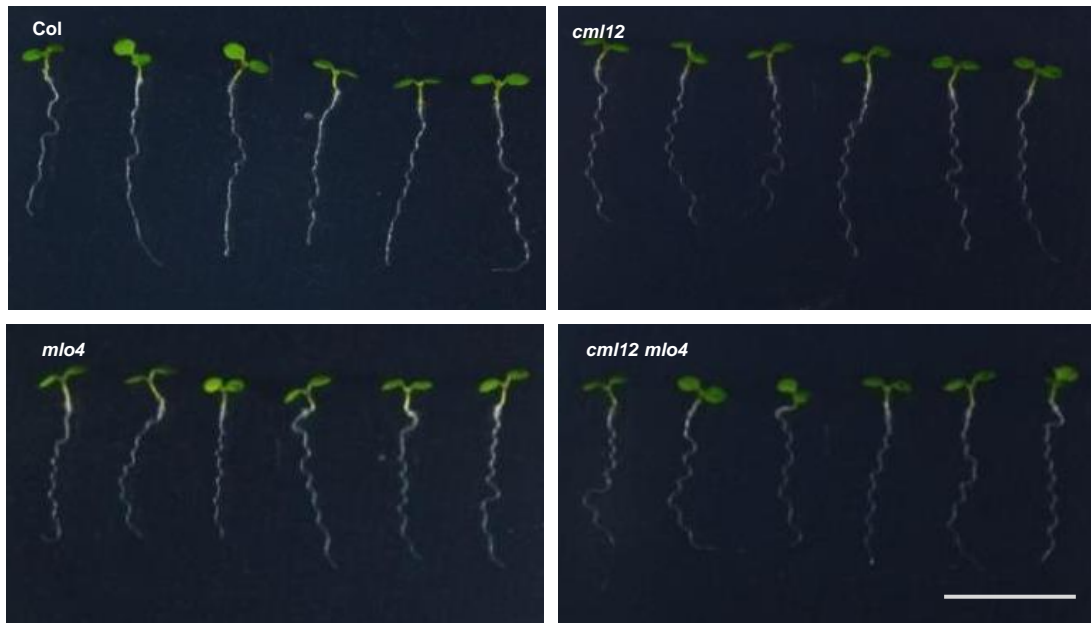

**Figure S4. *cml12* and *mlo4* roots shared similar growth pattern on reclined agar medium.** Single mutant *cml12* and *mlo4* roots formed denser loops and wavelengths were shorter. Phenotype of double mutant *cml12 mlo4* wasn't obviously aggravated. Bar = 1 cm.

## Supplemental figure 5

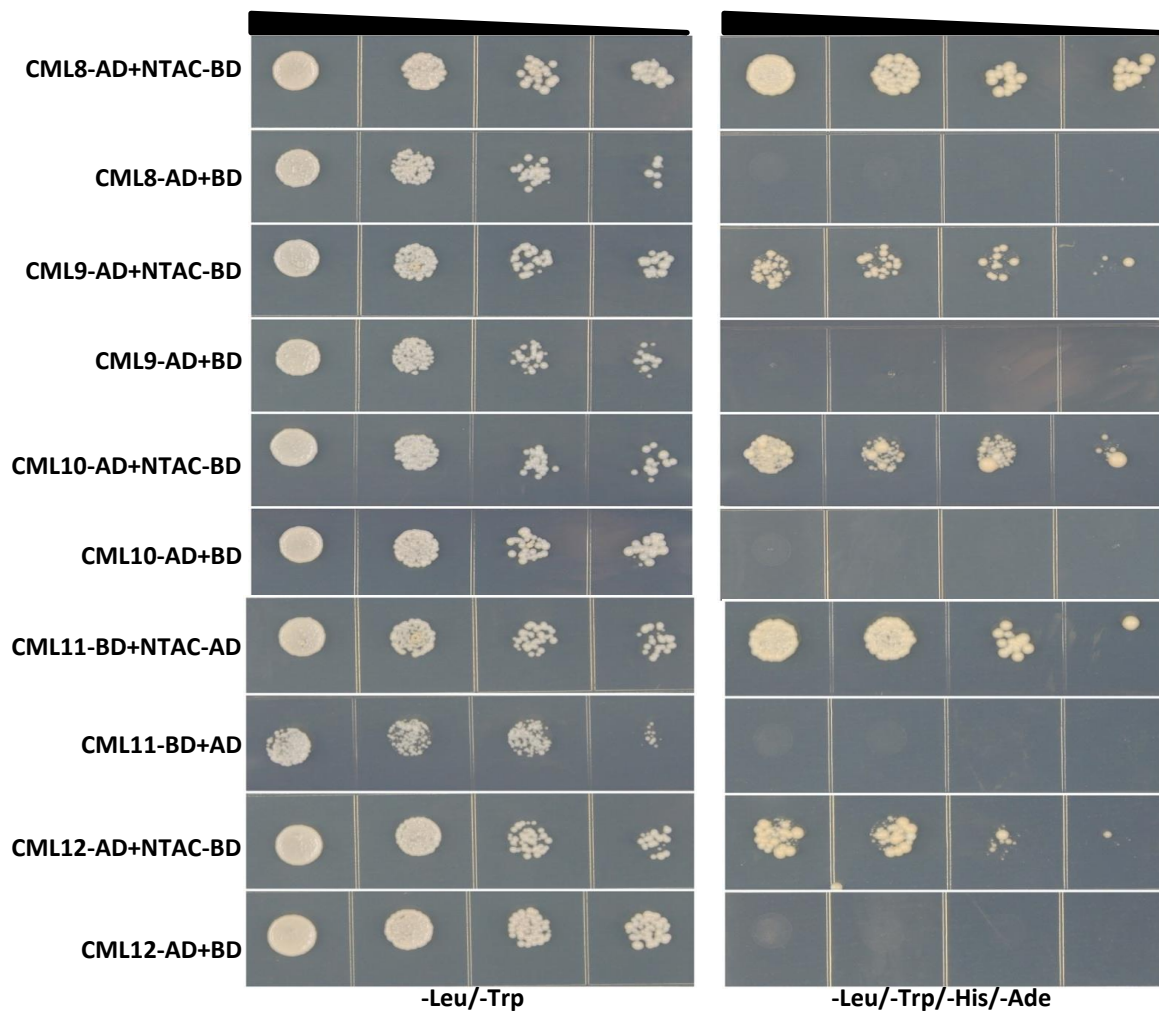

**Figure S5.** Y2H showed that NTA C-termini (NTAC) interacted with CML8-12 in yeast cells.

## Supplemental figure 6

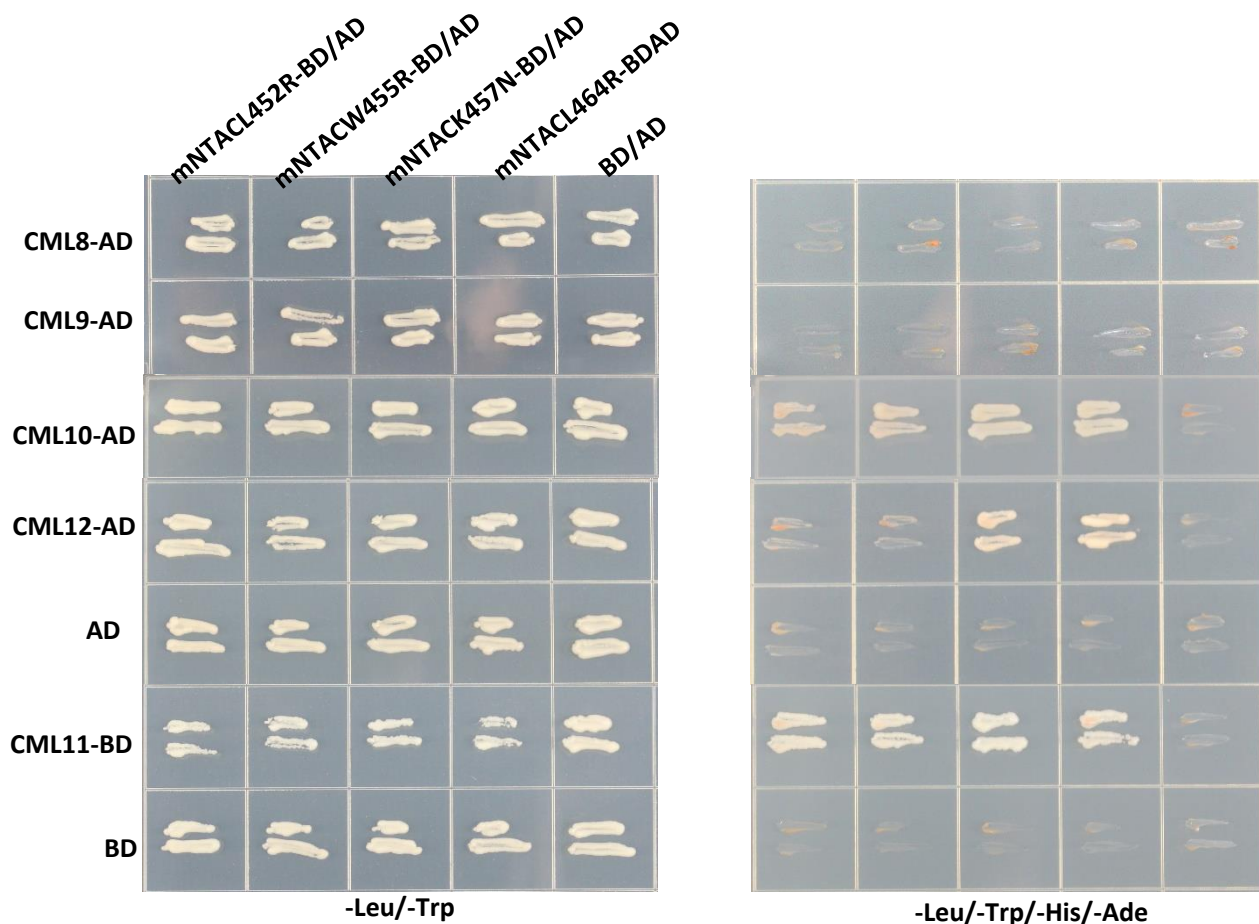

**Figure S6. Y2H showed interaction between NTA and CMLs was specific.**

NTA variants (L452R, W455R) with conservative sites changed were unable to interact with CML12. And NTA variants (K457N, L464R) with unconservative sites changed were still able to interact with CML12. All NTA variants (L452R, W455R, K457N, L464R) failed to interact with CML8 or CML9 but still bound CML10 and CML11.

## Supplemental figure 7

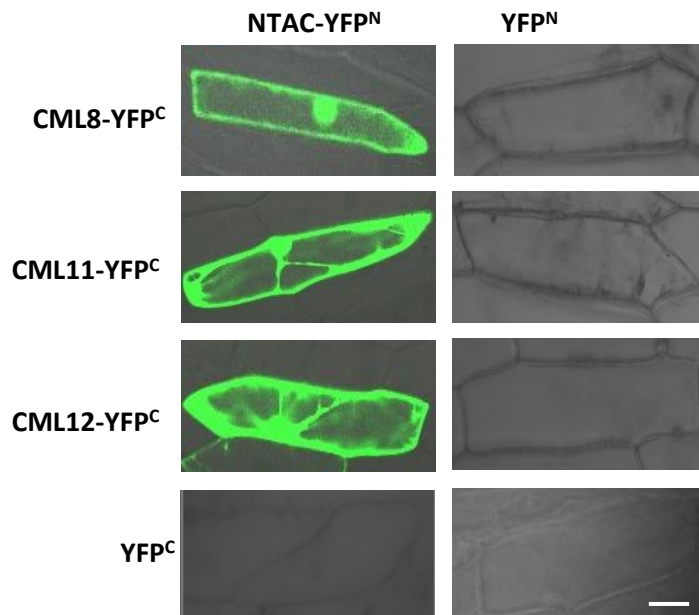

**Figure S7. BiFC showed that cytoplasmic domain of NTA interacted with CML8, CML9 and CML11. Bars= 50  $\mu$ m.**



## Supplemental figure 8

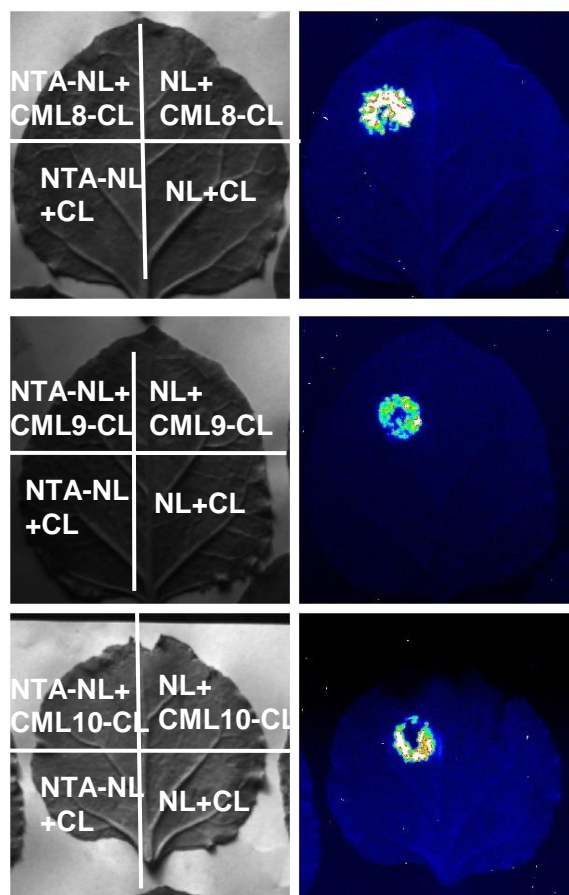

**Figure S8. LCI showed full length of MLO4 interacted with CML8, CML9 and CML10 in tobacco cells.**

Table S1. CML-BD interacted with MLO-AD

✓ 互作    × 不互作    \* 自激活    \* 无自激活

| BD       | AD | ML01C-AD | ML02C-AD | ML03C-AD | ML04C-AD | ML05C-AD | ML06C-AD | ML07C-AD | ML08C-AD | ML09C-AD | ML010C-AD | ML011C-AD | ML012C-AD | ML013C-AD | ML014C-AD | ML015C-AD |
|----------|----|----------|----------|----------|----------|----------|----------|----------|----------|----------|-----------|-----------|-----------|-----------|-----------|-----------|
| BD       | *  | *        | *        | *        | *        | *        | *        | *        | *        | *        | *         | *         | *         | *         | *         | *         |
| CaM1-BD  | *  | ×        | ×        | ×        | ×        | ×        | ×        | ×        | ×        | ×        | ×         | ×         | —         | ×         | ×         | ×         |
| CaM2-BD  | *  | ✓        | ×        | ×        | ×        | ×        | ×        | ×        | ×        | ×        | ×         | ×         | —         | ×         | ×         | ×         |
| CaM3-BD  | *  | ×        | ×        | ×        | ×        | ×        | ×        | ×        | ×        | ×        | ×         | ×         | —         | ×         | ×         | ×         |
| CaM4-BD  | *  | ×        | ×        | ×        | ×        | ×        | ×        | ×        | ×        | ×        | ×         | ×         | —         | ×         | ×         | ×         |
| CaM5-BD  | *  | ×        | ×        | ×        | ×        | ×        | ×        | ×        | ×        | ×        | ×         | ×         | —         | ×         | ×         | ×         |
| CaM6-BD  | *  | ×        | ×        | ×        | ×        | ×        | ×        | ×        | ×        | ×        | ×         | ×         | —         | ×         | ×         | ×         |
| CaM7-BD  | *  | ×        | ×        | ×        | ×        | ×        | ×        | ×        | ×        | ×        | ×         | ×         | —         | ×         | ×         | ×         |
| CML1-BD  | *  | ×        | ×        | ×        | ×        | ×        | ×        | ×        | ×        | ×        | ×         | ×         | —         | ×         | ×         | ×         |
| CML2-BD  | *  | —        | —        | —        | —        | —        | —        | —        | —        | —        | —         | —         | —         | —         | —         | —         |
| CML3-BD  | *  | ×        | ×        | ×        | ×        | ×        | ×        | ×        | ×        | ×        | ×         | ×         | —         | ×         | ×         | ×         |
| CML4-BD  | *  | ×        | ×        | ×        | ×        | ×        | ×        | ×        | ×        | ×        | ×         | ×         | —         | ×         | ×         | ×         |
| CML5-BD  | *  | ×        | ×        | ×        | ×        | ×        | ×        | ×        | ×        | ×        | ×         | ×         | —         | ×         | ×         | ×         |
| CML6-BD  | *  | ×        | ×        | ×        | ×        | ×        | ×        | ×        | ×        | ×        | ×         | ×         | —         | ×         | ×         | ×         |
| CML7-BD  | *  | ×        | ×        | ×        | ×        | ×        | ×        | ×        | ×        | ×        | ×         | ×         | —         | ×         | ×         | ×         |
| CML8-BD  | *  | —        | —        | —        | —        | —        | —        | —        | —        | —        | —         | —         | —         | —         | —         | —         |
| CML9-BD  | *  | —        | —        | —        | —        | —        | —        | —        | —        | —        | —         | —         | —         | —         | —         | —         |
| CML10-BD | *  | ×        | ×        | ×        | ×        | ×        | ×        | ×        | ×        | ✓        | ✓         | ×         | —         | ×         | ×         | ×         |
| CML11-BD | *  | —        | —        | —        | —        | —        | —        | —        | —        | —        | —         | —         | —         | —         | —         | —         |
| CML12-BD | *  | ×        | ×        | ×        | ×        | ×        | ×        | ✓        | ×        | ×        | ×         | ×         | —         | ×         | ×         | ×         |
| CML13-BD | *  | ×        | ×        | ×        | ×        | ×        | ×        | ×        | ×        | ×        | ×         | ×         | —         | ×         | ×         | ×         |
| CML14-BD | *  | ×        | ×        | ×        | ×        | ×        | ×        | ×        | ×        | ×        | ×         | ×         | —         | ×         | ×         | ×         |
| CML15-BD | *  | ×        | ×        | ×        | ×        | ×        | ×        | ×        | ×        | ×        | ×         | ×         | —         | ×         | ×         | ×         |
| CML16-BD | *  | ×        | ×        | ×        | ×        | ×        | ×        | ×        | ×        | ×        | ×         | ×         | —         | ×         | ×         | ×         |
| CML17-BD | *  | ×        | ×        | ×        | ×        | ×        | ×        | ×        | ✓        | ✓        | ✓         | ×         | —         | ×         | ✓         | ×         |
| CML18-BD | *  | ×        | ×        | ✓        | ×        | ✓        | ×        | ×        | ×        | ×        | ×         | ×         | —         | ×         | ✓         | ×         |
| CML19-BD | *  | —        | —        | —        | —        | —        | —        | —        | —        | —        | —         | —         | —         | —         | —         | —         |
| CML20-BD | *  | ×        | ×        | ✓        | ×        | ×        | ✓        | ×        | ×        | ✓        | ✓         | ✓         | —         | ×         | ✓         | ×         |
| CML21-BD | *  | ×        | ×        | ×        | ×        | ×        | ×        | ×        | ×        | ×        | ×         | ×         | —         | ×         | ×         | ×         |
| CML22-BD | *  | ×        | ×        | ×        | ×        | ×        | ×        | ×        | ×        | ×        | ×         | ×         | —         | ×         | ×         | ×         |
| CML23-BD | *  | ×        | ×        | ✓        | ×        | ×        | ×        | ×        | ✓        | ×        | ×         | ×         | —         | ×         | ×         | ×         |
| CML24-BD | *  | ×        | ×        | ×        | ×        | ×        | ×        | ×        | ×        | ×        | ×         | ×         | —         | ×         | ×         | ×         |
| CML25-BD | *  | ×        | ×        | ×        | ×        | ×        | ×        | ×        | ×        | ×        | ×         | ×         | —         | ×         | ×         | ×         |
| CML26-BD | *  | ×        | ×        | ✓        | ×        | ✓        | ✓        | ✓        | ✓        | ×        | ✓         | ×         | —         | ×         | ×         | ×         |
| CML27-BD | *  | ×        | ×        | ×        | ×        | ×        | ×        | ×        | ×        | ×        | ×         | ×         | —         | ×         | ×         | ×         |
| CML28-BD | *  | ×        | ×        | ×        | ×        | ×        | ×        | ×        | ×        | ×        | ×         | ×         | —         | ×         | ×         | ×         |
| CML29-BD | *  | ×        | ×        | ×        | ×        | ×        | ×        | ×        | ×        | ×        | ×         | ×         | —         | ×         | ×         | ×         |
| CML30-BD | *  | ×        | ×        | ×        | ×        | ×        | ×        | ×        | ×        | ×        | ×         | ×         | —         | ×         | ×         | ×         |
| CML31-BD | *  | ×        | ×        | ×        | ×        | ×        | ×        | ×        | ×        | ×        | ×         | ×         | —         | ×         | ×         | ×         |
| CML32-BD | *  | ×        | ×        | ✓        | ✓        | ✓        | ✓        | ✓        | ✓        | ✓        | ✓         | ×         | —         | ✓         | ×         | ×         |
| CML33-BD | *  | ×        | ×        | ×        | ×        | ×        | ✓        | ×        | ×        | ×        | ×         | ×         | —         | ×         | ×         | ×         |
| CML34-BD | *  | —        | —        | —        | —        | —        | —        | —        | —        | —        | —         | —         | —         | —         | —         | —         |
| CML35-BD | *  | —        | —        | —        | —        | —        | —        | —        | —        | —        | —         | —         | —         | —         | —         | —         |
| CML36-BD | *  | —        | —        | —        | —        | —        | —        | —        | —        | —        | —         | —         | —         | —         | —         | —         |
| CML37-BD | *  | —        | —        | —        | —        | —        | —        | —        | —        | —        | —         | —         | —         | —         | —         | —         |
| CML38-BD | *  | —        | —        | —        | —        | —        | —        | —        | —        | —        | —         | —         | —         | —         | —         | —         |
| CML39-BD | *  | ×        | ×        | ×        | ×        | ×        | ×        | ×        | ×        | ×        | ×         | ×         | —         | ×         | ×         | ×         |
| CML40-BD | *  | ×        | ×        | ✓        | ✓        | ✓        | ✓        | ✓        | ✓        | ✓        | ✓         | ×         | —         | ✓         | ×         | ×         |
| CML41-BD | *  | ×        | ×        | ×        | ×        | ×        | ×        | ×        | ×        | ×        | ×         | ×         | —         | ✓         | ×         | ×         |
| CML42-BD | *  | ×        | ×        | ×        | ×        | ×        | ×        | ×        | ×        | ✓        | ×         | ×         | —         | ×         | ×         | ×         |
| CML43-BD | *  | ×        | ×        | ×        | ×        | ×        | ×        | ×        | ×        | ×        | ×         | ×         | —         | ×         | ×         | ×         |
| CML44-BD | *  | ×        | ×        | ✓        | ✓        | ✓        | ✓        | ✓        | ✓        | ✓        | ✓         | ×         | —         | ×         | ×         | ✓         |
| CML45-BD | *  | ×        | ×        | ×        | ×        | ×        | ×        | ×        | ×        | ×        | ×         | ×         | —         | ×         | ×         | ×         |
| CML46-BD | *  | ×        | ×        | ×        | ×        | ×        | ×        | ×        | ×        | ×        | ×         | ×         | —         | ×         | ×         | ×         |
| CML47-BD | *  | ×        | ×        | ×        | ×        | ×        | ×        | ×        | ×        | ×        | ×         | ✓         | —         | ×         | ×         | ×         |
| CML48-BD | *  | —        | —        | —        | —        | —        | —        | —        | —        | —        | —         | —         | —         | —         | —         | —         |
| CML49-BD | *  | ×        | ×        | ×        | ×        | ×        | ✓        | ×        | ×        | ✓        | ×         | ×         | —         | ✓         | ×         | ×         |
| CML50-BD | *  | —        | —        | —        | —        | —        | —        | —        | —        | —        | —         | —         | —         | —         | —         | —         |

To be continued in the next page



**Table S3.** Primers used in the study.

| Uses of the primers | Names of the primers | Sequences of the primers ( 5'-3')   |
|---------------------|----------------------|-------------------------------------|
| Identify mutants    | SAIL-LB3             | TAGCATCTGAATTTTCATAACCAATCTCGATACAC |
|                     | SAIL266C02-1         | ATCTCGTTCCAATCCATGCTA               |
|                     | SAIL266C02-2         | CTCATCTTCCATCGTCCGTA                |
|                     | SAIL563E06-1         | GTTCTTGgtaaggccacctataaaatgca       |
|                     | SAIL563E06-2         | cctaatgccataatatctcgttccaatccatgc   |
|                     | LBa1                 | TGGTTCACGTAGTGGGCCATCG              |
|                     | SK122731-1           | ggtaacacactaacacatgc                |
|                     | SK122731-2           | AGGTCATGATCAAGCGCC                  |
| Real-time-PCR       | MLO4-P1              | GAGACTCACTTCACAGTTGG                |
|                     | MLO4-P2              | CTCTGCTTGGTCTATGGAGT                |
|                     | MLO4-P3              | GGCAACATTCATCTGGTTCT                |
|                     | MLO4-P4              | CCATAACTACACCAGAACTG                |
|                     | CML12-P1             | GTACTACTATGCGCTCCCTT                |
|                     | CML12-P2             | GACCTTGATTCACAACTCTG                |
|                     | CML12-P3             | TACCGTGATGTTTTCCCTCG                |
|                     | CML12-P4             | ATCTGATCGTCAGTGAGCTG                |
| GUS assay           | HindIII-PCML12       | CCC AAGCTT AATGACCGACTTCATCAAAA     |
|                     | PCML12-XbaI          | AGC TCTAGA tgatgactgaaagaagagtttgta |
|                     | XbaI-TCH3            | AGC TCTAGA CAGAAAACAAAAAACA         |
|                     | TCH3-BamHI           | TCA GGATCC AGATAACAGCGCTTCGAACA     |
| Complementation     | HindIII-PCML12       | CCC AAGCTT AATGACCGACTTCATCAAAA     |
|                     | PCML12-PstI          | CGA CTGCAG tgatgactgaaagaagagtttgta |
|                     | PstI-TCH3            | CGA CTGCAG CAGAAAACAAAAAACA         |
|                     | TCH3-BamHI           | TCA GGATCC AGATAACAGCGCTTCGAACA     |
| Y2H                 | NdeI-CML12           | CTC CATATG CAGAAAACAAAAAACAAT       |
|                     | CML12-BamHI          | CTA GGATCC AGATAACAGCGCTTCGAACA     |
|                     | NdeI-MLO4C           | CTC CATATG ACTCAGATGGGATCTCGGCAT    |
|                     | MLO4C-ECORI          | CTG GAATTC AGTCCTCCTAAACAACCTCA     |

To be continued in the next page

|      |             |                                           |
|------|-------------|-------------------------------------------|
| BiFC | Xbal-CML12  | AGC TCTAGA CAGAAAACAAAAAAACA              |
|      | CML12-BamHI | TCA GGATCC AGATAACAGCGCTTCGAACA           |
|      | Xbal-MLO4   | CTG TCTAGA ATGGAGCATATGATGAAAGAAGG        |
|      | MLO4-BamHI  | CTA GGATCC AGTCCTCCTAAACAACTCAAG          |
|      | Xbal-MLO4C  | TAG TCTAGA ACTCAGATGGGATCTCGGCA           |
| LCI  | KpnI-CML12  | TAC GGTACC CAGAAAACAAAAAAACA              |
|      | CML12-Sall  | CAT GTCGAC TCAAGATAACAGCGCTTCGAACAA       |
|      | KpnI-MLO4   | CTA GGTACC ATGGAGCATATGATGAAAGAAGG        |
|      | MLO4-Sall   | CTA GTCGAC AGTCCTCCTAAACAACTCAAG          |
| Y2H  | NcoI-CaM1   | CATG CCATGG AC ATGGCGGATC AACTCACTGA      |
|      | CaM1-Sall   | CGC GTCGAC CTTAGCCATCATAATCTTGA           |
|      | CAM1-CLaI   | CCC ATCGAT AC ATGGCGGATC AACTCACTGA       |
|      | NdeI-CaM2   | ATC CATATG ATGGCGGATCAGCTCACAGACGATCAG    |
|      | CaM2-BamHI  | CAT GGATCC CTTAGCCATCATAACCTTCA           |
|      | ECoRI-CaM3  | CTC GAATTC ATGGCGGATCAGCTCACCGA           |
|      | CaM3-BamHI  | CGC GGATCC CTTAGCCATCATGACCTTAA           |
|      | CAM4-ECoRI  | CCG GAATT ATGATTAGCT AAAAACCCTAG          |
|      | CAM4-BamHI  | CGC GGATCC CAACAAAATA AAAAAAGATA AGTC     |
|      | NdeI-CaM5   | CGA CATATG ATGGCAGATCAGCTACCGATGATC       |
|      | CaM5-BamHI  | CGA GGATCC GAGAATACGGCAGTGACTTTT          |
|      | BamHI-CaM6  | CGC GGATCC AC ATGGCGGATCAGCTACCGATGACCAGA |
|      | CaM6-XhoI   | ATC CTCGAG CTTAGCCATCATGACTTTGA           |
|      | CaM6-Sall   | CGC GTCGAC CTTAGCCATCATGACTTTGACGAATTC    |
|      | ECoRI-CaM7  | CGC GAATTC ATGGCGGATCAGCTAACCGA           |
|      | CaM7-BamHI  | CCG GGATCC CTTTGCCATCATGACTTTGA           |
|      | ECoRI-CML1  | CAT GAATTC ATGCCGATAT TCCAGTGGCT          |
|      | CML1-BamHI  | CAC GGATCC TCTATTGCTA AAGTCACCACT         |

To be continued in the next page

|     |             |                                             |
|-----|-------------|---------------------------------------------|
| Y2H | ECoRI-CML2  | CCG GAATTC ATGGATCGTG GAGAATTGAGT AGAG      |
|     | CML2-BamHI  | CGC GGATCC ATTGGAGCTA AGAGCAGCAAA TCC       |
|     | ECoRI-CML3  | CCG GAATTC ATGGATCAAG CGGAGCTTGCC AGGAT     |
|     | CML3-BamHI  | CGC GGATCC CAAGTTTGAT CCTAAGGCGGC A         |
|     | NdeI-CML4   | CGC CATATG ATGGTGAGAG TCTTTCTTCTC           |
|     | CML4-BamHI  | CGC GGATCC TGATCTATTG CTAAAGTCACC AC        |
|     | ECoRI-CML5  | CCG GAATTC ATGGTGAGAA TATTCCTTCTC TAC       |
|     | CML5-BamHI  | CGC GGATCC ATTACTGCTG CTAAAGCCACC ACC       |
|     | ECoRI-CML6  | CCG GAATTC ATGGATTCCA CGGAGCTGAAC CGT       |
|     | CML6-BamHI  | CGC GGATCC GCTCAAAGAG CTAAAAAAGCG ACCC      |
|     | NdeI-CML7   | CGC CATATG ATGGATCCGA CAGAGCTAAAA CGCGTGTTC |
|     | CML7-ECoRI  | ATC GAATTC CAAAGAATTA AAACCACCGCC TTTC      |
|     | ECoRI-CML8  | CCG GAATTC ATGGAAGAAA CAGCACTGAC AA         |
|     | CML8-BamHI  | CGC GGATCC GTCAATGTTG ATCATCATCT TG         |
|     | NcoI-CML9   | CTA CCATTG AG ATGGCGGATGCTTTCACAGATG        |
|     | ClaI-CML9   | CCC ATCGAT AC ATGGCGGATG CTTTCACAGA TGAAC   |
|     | CML9-BamHI  | CGC GGATCC ATAAGAGGCA GCAATCATCA TT         |
|     | ECoRI-CML10 | CCG GAATTC ATGGCGAATA AGTTCACTAG ACAA       |
|     | CML10-BamHI | CGC GGATCC AGAAAACAAC GCTTCGAACA AA         |
|     | ECoRI-CML11 | CCG GAATTC ATGGAAGAAA TTCAACAACA ACAAC      |
|     | CML11-BamHI | CGC GGATCC ACCATTGATC ATCATCATCC TGAC       |
|     | NdeI-CML13  | CGC CATATG ATGGGGAAAG ATGGTCTGAG CGAC       |
|     | CML13-ECoRI | CCG GAATTC CTTAGCAACC ATCCTTGCTA TG         |
|     | ECoRI-CML14 | CCG GAATTC ATGAGCAAGG ATGGTTTGAG CA         |
|     | CML14-BamHI | CGC GGATCC TTAAGTAGCA ACCATTCTAG C          |
|     | NdeI-CML15  | CGC CATATG ATGGAGGATC AGATAAGACA AC         |
|     | CML15-BamHI | CGC GGATCC CGAATTAATT TTTAATCCAA AGTAATC    |
|     | NdeI-CML16  | CGC CATATG ATGGCGTCAA CAAAACCAAC CGAT       |
|     | CML16-ECoRI | CCG GAATTC AGAAGCGGTT AATCCAAGAA            |
|     | ECoRI-CML17 | CCG GAATTC ATGAGTCACA AAGTCTCCAA AAAG       |
|     | CML17-BamHI | CGC GGATCC ACCCCATATA TCATCAAATG CAGC       |

To be continued in the next page

|     |             |                                           |
|-----|-------------|-------------------------------------------|
| Y2H | ECoRI-CML18 | CCG GAATTC ATGAGCTGCG ACGGAGGCAA A        |
|     | CML18-BamHI | CGC GGATCC ACCCCAAGCA TTATCAAACG CAGCT    |
|     | ECoRI-CML19 | CCG GAATTC ATGGCGAATT ACATGTCGGA AGCAG    |
|     | CML19-BamHI | CGC GGATCC GCCGTAAGAG GTTCTCTTCA TCATC    |
|     | NcoI-CML20  | CATG CCATGG AC ATGTCGAGTA TATACAGAAC TG   |
|     | CML20-CLaI  | CCC ATCGAT AC ATGTCGAGTA TATACAGAAC TG    |
|     | CML20-BamHI | CGC GGATCC CTAGTTACCA CCATAAGCAG TTC      |
|     | NdeI-CML21  | CGC CATATG ATGGGAGGTGCAGTGACGAAATCTGA     |
|     | CML21-BamHI | CGC GGATCC AGCTTTCTCATTGTTGTCTTC          |
|     | ECoRI-CML22 | CCG GAATTC ATGCTTTGCTGCTGTGTTAACT         |
|     | CML22-BamHI | CGC GGATCC GCTGCTCATAAAATCATCATCTGC       |
|     | ECoRI-CML23 | CCG GAATTC ATGTCGAAGAACGTTTCGAGAAAC       |
|     | CML23-BamHI | CGC GGATCC AGCACTACCATTAAATCATCATCAT      |
|     | NcoI-CML24  | CATG CCATGG AC ATGTCATCGA AGAACGGAGT TG   |
|     | CML24-CLaI  | CCC ATCGAT AC ATGTCATCGA AGAACGGAGT TG    |
|     | CML24-BamHI | CGC GGATCC TCAAGCACCA CCACCATTAC TC       |
|     | NdeI-CML25  | CGC CATATG ATGTTCAACAAAAACCAAGGATCC       |
|     | CML25-ECoRI | ATC GAATTC CCTCGGACCACCTCCCATGACAT        |
|     | ECoRI-CML26 | CCG GAATTC ATGGCAAACACAAATCTTGAATCCA      |
|     | CML26-BamHI | CGC GGATCC AGAGTTCGCAACGGTTCCTTAACG       |
|     | NcoI-CML27  | CATG CCATGG AC ATGGCAAGCG CGAATCCAGA AACC |
|     | CML27-CLaI  | CCC ATCGAT AC ATGGCAAGCG CGAATCCAGA AACC  |
|     | CML27-SacI  | C GAGCT CTAGGTCGAA GGAGGAGCGG CGGAT       |
|     | NdeI-CML28  | CGC CATATG ATGGCTGACGCAACAGAAAAAGCTG      |
|     | CML28-BamHI | CTA GGATCC GAAAATCTTGGCAACGTCTTTC         |
|     | NdeI-CML29  | CAT CATATG ATGGCTGATGCAACGGAGAAAGCCG      |
|     | CML29-BamHI | CTC GGATCC GAAAATTTTGGCAACATCCTTCATAAGTCC |
|     | ECoRI-CML30 | CCG GAATTC ATGTCAAACGTGAGTTTTCTTGAGTTGC   |
|     | CML30-BamHI | CGC GGATCC GACATTGTTGGAAGACATCATTTTG      |
|     | NdeI-CML31  | CGC CATATG ATGGCAGAGATTTTCGAAAGTGTTGAC    |
|     | CML31-BamHI | CGC GGATCC ATGTGACTCTTTGTTAGAGTTCATC      |
|     | ECoRI-CML32 | CCG GAATTC ATGTCTGTTGCAGAGATCTTCGAG       |
|     | CML32-BamHI | CGC GGATCC TTGTAATTTTTTGTGTTACAACATCATC   |

|     |              |                                        |
|-----|--------------|----------------------------------------|
| Y2H | ECoRI-CML33  | CCG GAATTC ATGAATAATATGTCTTTAAGTGATATC |
|     | CML33-BamHI  | CGC GGATCC AACTCCTACGAATCTAATATAACC    |
|     | ECoRI-CML34  | CCG GAATTC ATGTCTGCAAAACGTGTCTTCGAG    |
|     | CML34-BamHI  | CGC GGATCC TATGTCACCAATAACCAAAGCCAT    |
|     | ECoRI-CML35  | CCG GAATT ATGAAGCTCG CCGCTAGCCT CAA    |
|     | CML35-BamHI  | CGC GGATCC CTAATGATGA TGATCATTCA TCGC  |
|     | MLO2C-ECoRI  | CTC GAATTC TTTCTTAAAAGAAAAATCTC        |
|     | NdeI-MLO3C   | CTC CATATG ACTCAGATGGGGTCAAGCTACAA     |
|     | MLO3C-ECoRI  | CTG GAATTC CCTTTCAGTTTTCTCTTGTA        |
|     | NdeI-MLO4C   | CTC CATATG ACTCAGATGGGATCTCGGCAT       |
|     | MLO4C-ECoRI  | CTG GAATTC AGTCCTCCTAAACAACCTCA        |
|     | NdeI-MLO5C   | CTC CATATG AACTTCCTCTTTACGCTCTCG       |
|     | MLO5C-ECoRI  | CTA GAATTC GGGACCGCTTAAGAGGTCT         |
|     | NdeI-MLO6C   | CTC CATATG GTTACTCAAATGGGTTCAAAG       |
|     | MLO6C-SacI   | TCA GAGCTC TCGCTTAAACGAAAAATCCC        |
|     | MLO6C-SalI   | TCA GTCGAC TCGCTTAAACGAAAAATCCC        |
|     | NdeI-MLO8C   | CTC CATATG ACTCAGATGGGTTCTCGGATG       |
|     | MLO8C-ECoRI  | CCG GAATTC CCGGTCTTGAGATGATTCA         |
|     | NdeI-MLO9C   | CTC CATATG ACATTGCCCTTTACGCTCT         |
|     | MLO9C-ECoRI  | CTG GAATTC CTTTTATTCTTTTTCTCGCC        |
|     | NdeI-MLO10C  | CTC CATATG CAGATGGGTTCAAACATGAAG       |
|     | MLO10C-ECoRI | CTG GAATTC GTCAATATCATTAGCAGGAACG      |
|     | NdeI-MLO11C  | CTC CATATG ACTCAGATGGGAACGAACCTAT      |
|     | MLO11C-ECoRI | CTG GAATTC GACTCTCTTCTCACTTGGCA        |
|     | NdeI-MLO12C  | TCA CATATG GTTACTCAGATGGGAACATCA       |
|     | MLO12C-BamHI | TCA GGATCC CTTCTTGAACGTAACTCAGAC       |
|     | NdeI-MLO13C  | CTC CATATG ACACAAATGGGTAGCAAATTC       |
|     | MLO13C-ECoRI | CTG GAATTC AGGGTTTTCACTTTGGACA         |
|     | NdeI-MLO14C  | CTC CATATG ACTCAGATGGGAACAACTAC        |
|     | MLO14C-ECoRI | CTG GAATTC ACATTCTCTTCTCATTGGC         |
|     | NdeI-MLO15C  | CTC CATATG CTCGTCATCGGGGTAATAAT        |
|     | MLO15C-ECoRI | CTG GAATTC ATCATGGTGAGCAATCTCTGAT      |
|     | CML48-BamHI  | CGC GGATCC ATCATAGGTGGCGATGAACGGAATG   |



|     |              |                                       |
|-----|--------------|---------------------------------------|
| Y2H | ECoRI-CML49  | CTA GAATTC ATGTCTGGTTATCCTCCATC       |
|     | CML49-BamHI  | ATC GGATCC AGCGACGAGGAATGGTAAAAC      |
|     | ECoRI-CML50  | CCG GAATTC ATGTCAGGATATCCTCCGACTAGCCA |
|     | CML50-BamHI  | CGC GGATCC TGCATGAGGAAGGGGAGGACGGT    |
|     | NdeI-MLO1C   | CTC CATATG TCACAGATGGGAAGTAGCTTCAAG   |
|     | MLO1C-BamHI  | TCA GGATCC GTTGTTATGATCAGGTGTAATCTC   |
|     | NdeI-MLO2C   | CTC CATATG ACTCAGATGGGTAGTAAAATG      |
|     | MLO2C-ECoRI  | CTC GAATTC TTTCTTAAAAGAAAAATCTC       |
|     | NdeI-MLO3C   | CTC CATATG ACTCAGATGGGGTCAAGCTACAA    |
|     | MLO3C-ECoRI  | CTG GAATTC CCTTTCAGTTTTCTCTTGTA       |
|     | NdeI-MLO4C   | CTC CATATG ACTCAGATGGGATCTCGGCAT      |
|     | MLO4C-ECoRI  | CTG GAATTC AGTCCTCCTAAACAACTCA        |
|     | NdeI-MLO5C   | CTC CATATG AACTTCCTCTTTACGCTCTCG      |
|     | MLO5C-ECoRI  | CTA GAATTC GGGACCGCTTAAGAGGTCT        |
|     | NdeI-MLO6C   | CTC CATATG GTTACTCAAATGGGTTCAAAG      |
|     | MLO6C-SacI   | TCA GAGCTC TCGCTTAAACGAAAAATCCC       |
|     | MLO6C-SalI   | TCA GTCGAC TCGCTTAAACGAAAAATCCC       |
|     | NdeI-MLO8C   | CTC CATATG ACTCAGATGGGTTCTCGGATG      |
|     | MLO8C-ECoRI  | CCG GAATTC CCGGTCTTGAGATGATTCA        |
|     | NdeI-MLO9C   | CTC CATATG ACATTGCCCTTTACGCTCT        |
|     | MLO9C-ECoRI  | CTG GAATTC CTTTTATTCTTTTTCTCGCC       |
|     | NdeI-MLO10C  | CTC CATATG CAGATGGGTTCAAACATGAAG      |
|     | MLO10C-ECoRI | CTG GAATTC GTCAATATCATTAGCAGGAACG     |
|     | NdeI-MLO11C  | CTC CATATG ACTCAGATGGGAACGAACTAT      |
|     | MLO11C-ECoRI | CTG GAATTC GACTCTCTTCTCACTTGGCA       |
|     | NdeI-MLO12C  | TCA CATATG GTTACTCAGATGGGAACATCA      |
|     | MLO12C-BamHI | TCA GGATCC CTTCTTGAACGTAACTCAGAC      |
|     | NdeI-MLO13C  | CTC CATATG ACACAAATGGGTAGCAAATTC      |
|     | MLO13C-ECoRI | CTG GAATTC AGGGTTTTCACTTTGGACA        |
|     | NdeI-MLO14C  | CTC CATATG ACTCAGATGGGAACAACTAC       |
|     | MLO14C-ECoRI | CTG GAATTC ACATTCTCTTCTCATTGGC        |
|     | NdeI-MLO15C  | CTC CATATG CTCGTCATCGGGGTAATAAT       |
|     | MLO15C-ECoRI | CTG GAATTC ATCATGGTGAGCAATCTCTGAT     |
